# Supplementary material
Source: PubMed Central journal article supplement (PMC5337115)
Supplement: NIHMS846975-supplement-1.pdf [file NIHMS846975-supplement-1.pdf]

## Supplementary data

### Extracellular *Toxoplasma gondii* tachyzoites metabolize and incorporate unnatural sugars into cellular proteins

Lidia A. Nazarova<sup>1,3</sup>, Roxanna J. Ochoa<sup>2,3</sup>, Krysten A. Jones<sup>2</sup>, Naomi S. Morrissette<sup>2\*</sup>, and Jennifer A. Prescher<sup>1,2\*</sup>

Departments of <sup>1</sup>Chemistry and <sup>2</sup>Molecular Biology and Biochemistry  
University of California, Irvine, Irvine CA 92697

#### Corresponding authors:

Jennifer A. Prescher

Departments of Chemistry, Molecular Biology and Biochemistry, and Pharmaceutical Sciences

University of California, Irvine

Irvine, CA 92697

(949) 824-1706 (phone)

[jpresche@uci.edu](mailto:jpresche@uci.edu)

Naomi S. Morrissette

Department of Molecular Biology and Biochemistry

University of California, Irvine

Irvine, CA 92697

(949) 824-9243 (phone)

[nmorriss@uci.edu](mailto:nmorriss@uci.edu)

<sup>3</sup>These authors contributed equally to this manuscript.

**Running title: Protein glycosylation in *Toxoplasma***

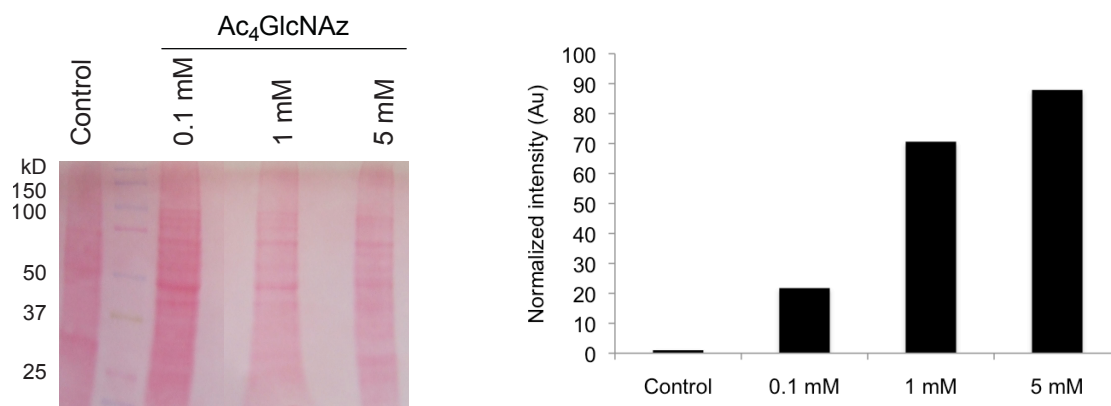

**Figure S1.** Equivalent protein loading for the blot pictured in Figure 1B was confirmed via staining with Ponceau S (left). Densitometry of Figure 1B (right).



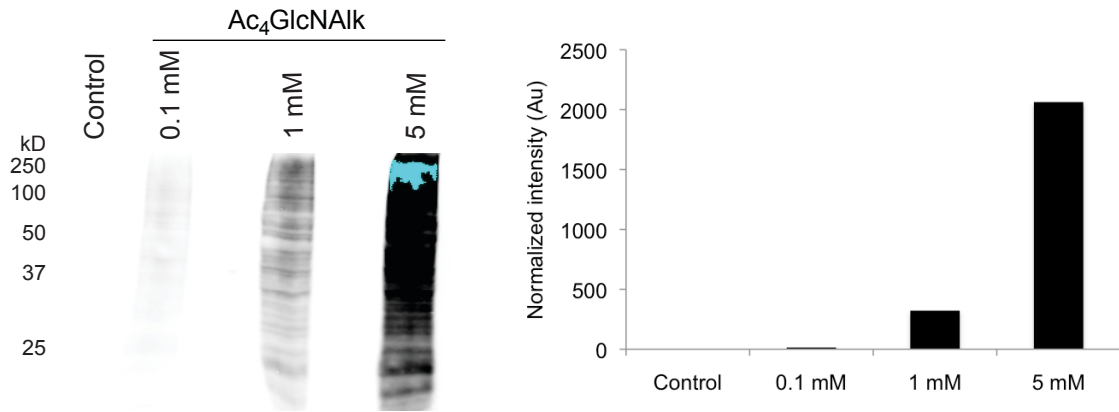

**Figure S2.** *Toxoplasma* tachyzoites incorporate Ac<sub>4</sub>GlcNAIk in a dose-dependent manner. Parasites were incubated with unnatural sugar (0.1-5 mM) or the control sugar Ac<sub>4</sub>GlcNAc for 8 hours, lysed, and reacted with a biotin-az tag via “click” chemistry. The labeled proteins were separated via gel electrophoresis and detected via immunoblot with streptavidin (left). Densitometry analysis of the blot (right).

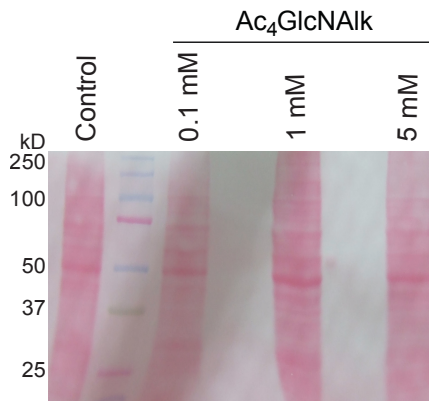

**Figure S3.** Equivalent protein loading for the above blot was confirmed via staining with Ponceau S.

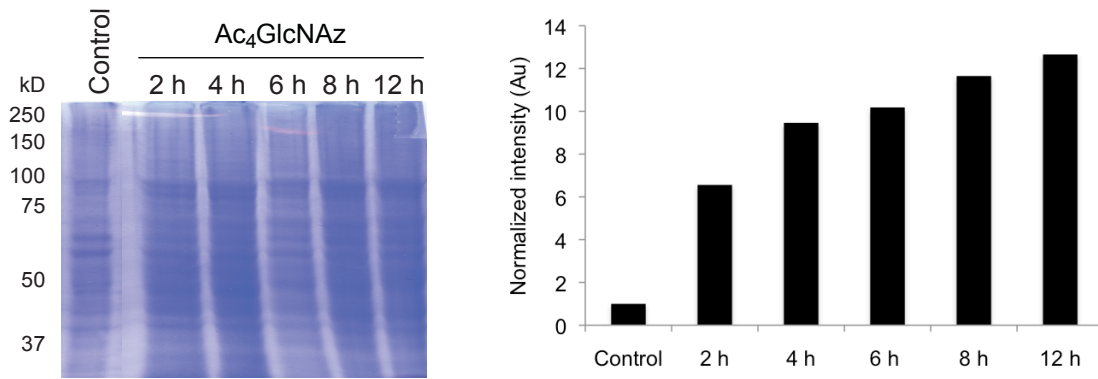

**Figure S4.** Equivalent protein loading for the blot pictured in Figure 1C was confirmed via staining with Ponceau S (left). Densitometry of Figure 1C (right).

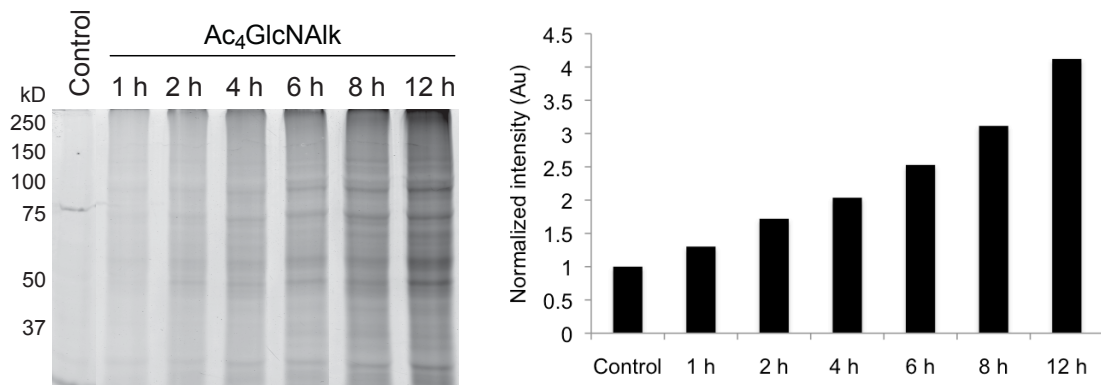

**Figure S5.** *Toxoplasma* tachyzoites incorporate Ac<sub>4</sub>GlcNAIk in a time-dependent manner. Parasites were incubated with Ac<sub>4</sub>GlcNAIk (1 mM) or the control sugar Ac<sub>4</sub>GlcNAc (1 mM) for 1-12 h hours, lysed, and reacted with a rhodamine-azide probe. Labeled proteins were separated via gel electrophoresis and analyzed via in-gel fluorescence (left). Densitometry analysis of the blot (right).

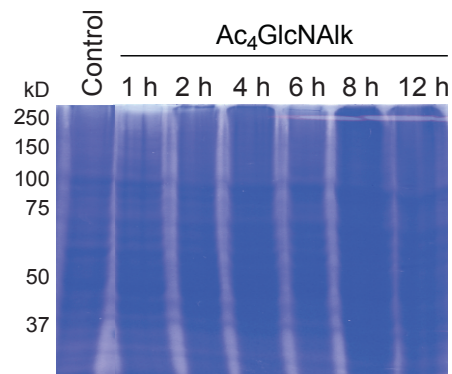

**Figure S6.** Equivalent protein loading for the above blot was confirmed via staining with Ponceau S.

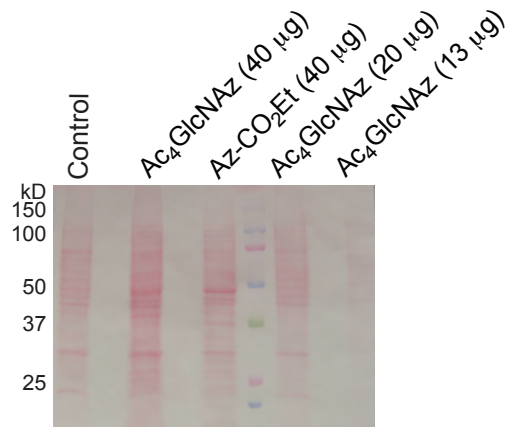

**Figure S7.** Equivalent protein loading for the blot pictured in Figure 1D was confirmed via staining with Ponceau S.

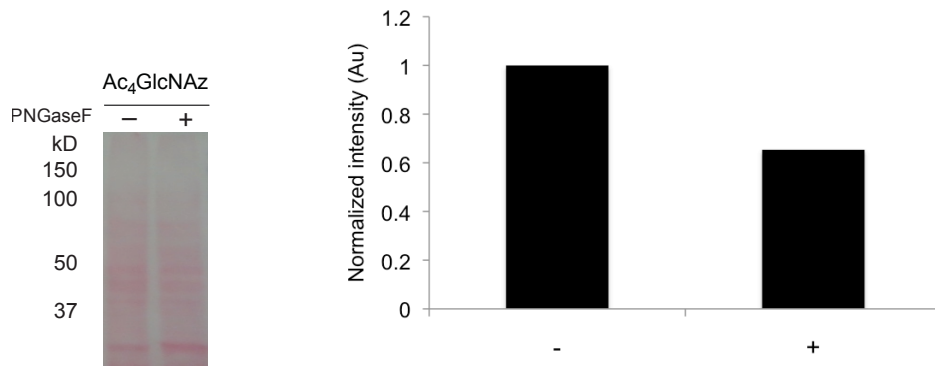

**Figure S8.** Equivalent protein loading for the blot pictured in Figure 3A was confirmed via staining with Ponceau S (left). Densitometry of Figure 3A (right).

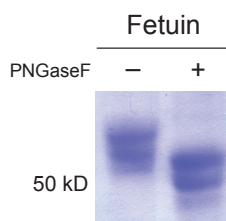

**Figure S9.** Fetuin protein was treated with PNGase F. The samples were analyzed via gel electrophoresis and stained with Coomassie Brilliant Blue.

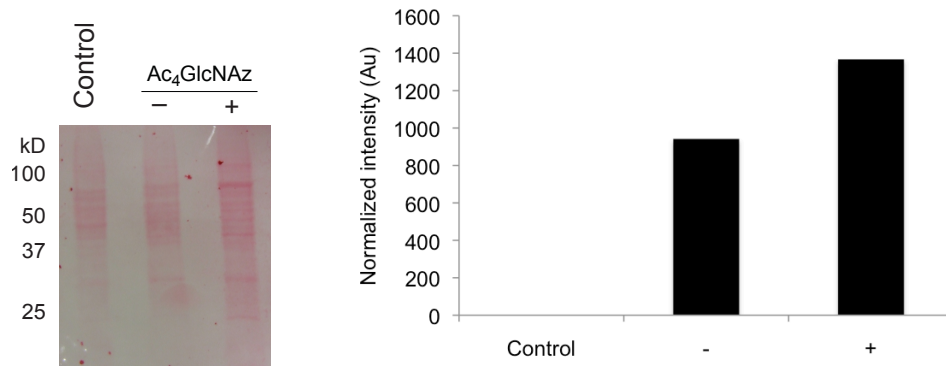

**Figure S10.** Equivalent protein loading for the blot pictured in Figure 3B was confirmed via staining with Ponceau S (left). Densitometry of Figure 3B (right).

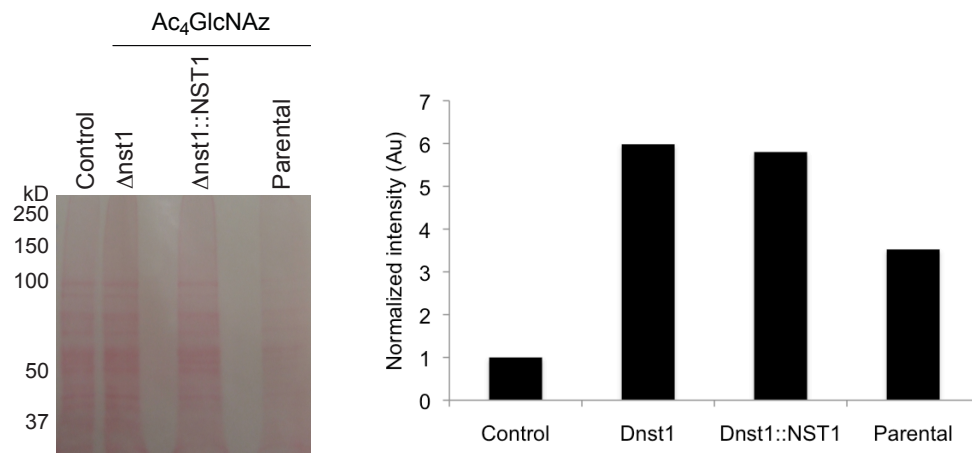

**Figure S11.** Equivalent protein loading for the blot pictured in Figure 3C was confirmed via staining with Ponceau S (left). Densitometry of Figure 3C (right).

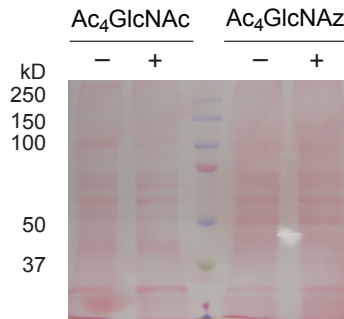

**Figure S12. A.** Equivalent protein loading for the blot pictured in Figure 3D was confirmed via staining with Ponceau S.

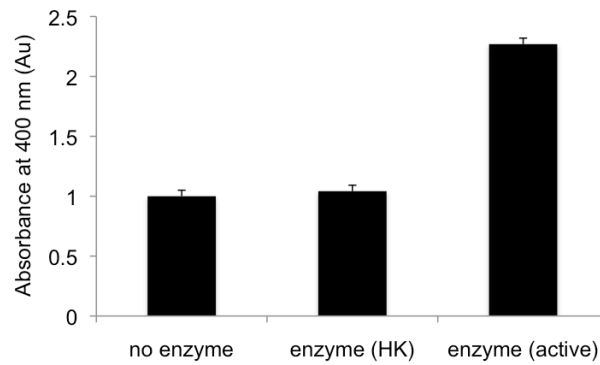

**B.** As a control, 45  $\mu$ L of 0.1 mg/mL 4-Nitrophenyl-N-acetyl- $\beta$ -D-glucosaminide (Sigma) was incubated with 5  $\mu$ L of G2 reaction buffer and 1  $\mu$ L of hexosaminidase (active or heat-killed) or 1  $\mu$ L of water for 2 h at RT. The amount of released 4-Nitrophenol was measured by reading absorbance at 400 nm.



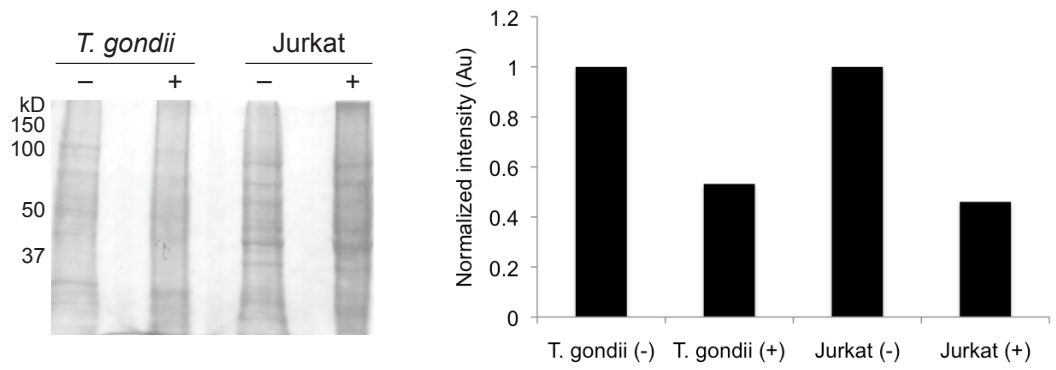

**Figure S13.** Equivalent protein loading for the blot pictured in Figure 3E was confirmed via staining with Ponceau S (left). Densitometry of Figure 3E (right).

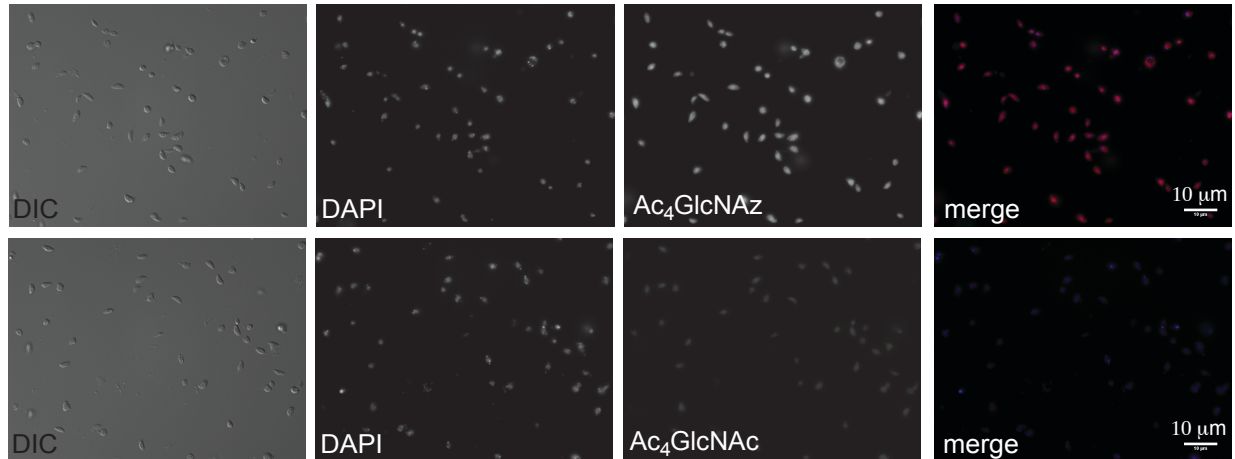

**Figure S14. Labeling of *Toxoplasma* tachyzoites with unnatural sugars in DMEM media via fluorescence microscopy.** Parasites were incubated with Ac<sub>4</sub>GlcNAz (1 mM) or Ac<sub>4</sub>GlcNAc (1 mM) for 8 h, prior to fixation with 4% paraformaldehyde in PBS for 15 min at rt. Subsequent reaction with biotin-alk and incubation with streptavidin-AlexaFluor594 enabled fluorescence detection of modified glycoconjugates.

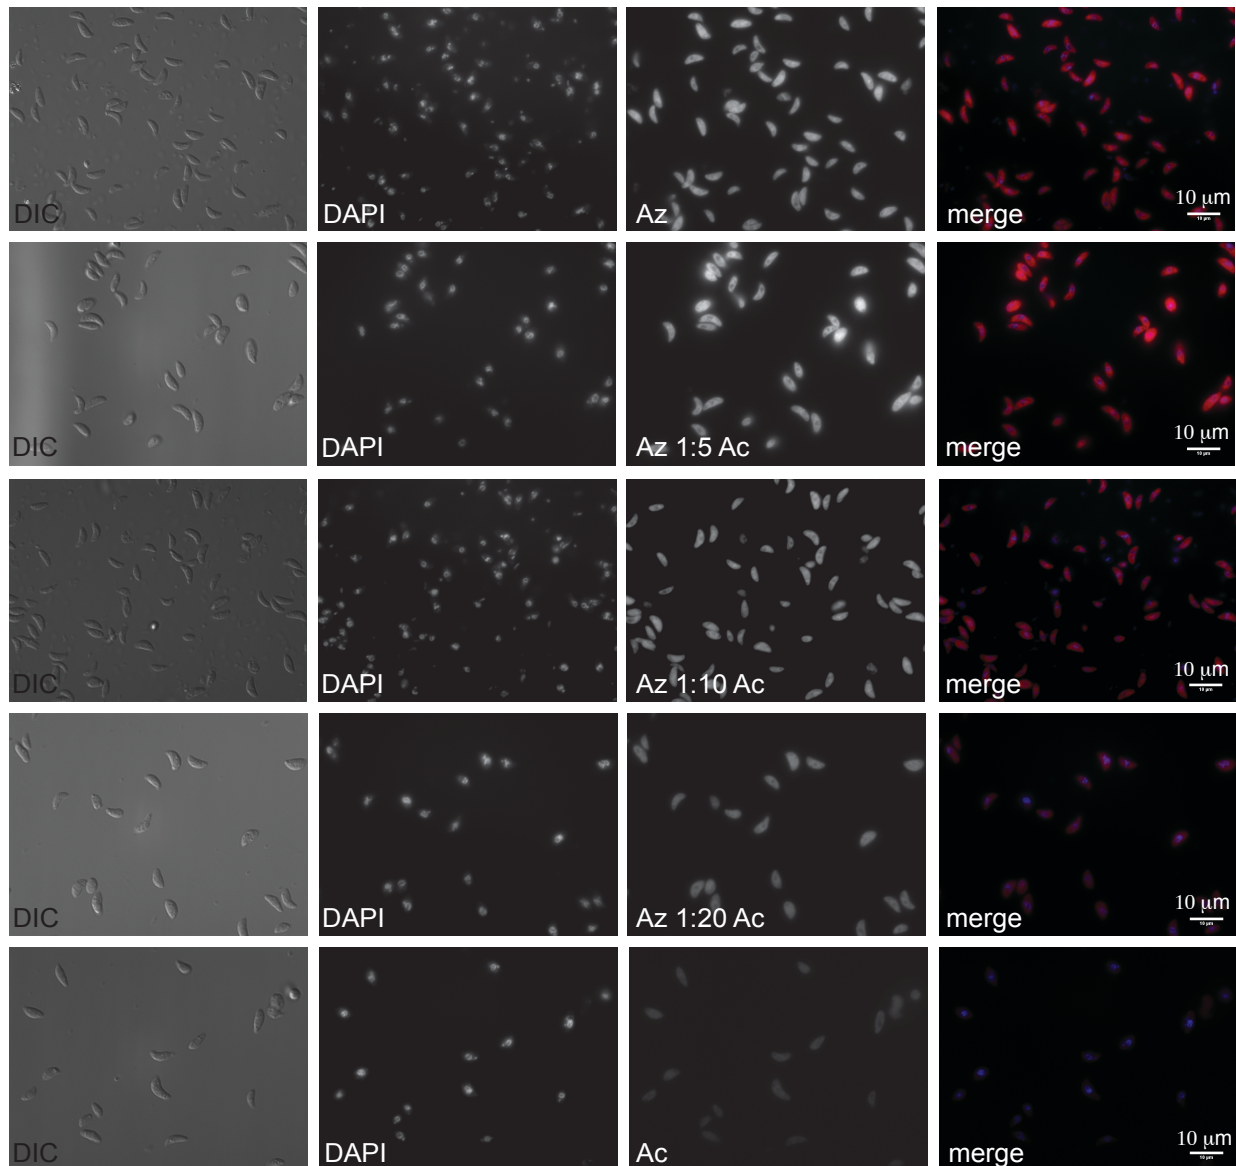

**Figure S15. Intensity of Ac<sub>4</sub>GlcNAz signal can be decreased by the addition of Ac<sub>4</sub>GlcNAc.** Parasites were incubated with Ac<sub>4</sub>GlcNAz (1 mM) or a mixture of Ac<sub>4</sub>GlcNAz (Az) and Ac<sub>4</sub>GlcNAc (Ac) (from 1:5 to 1:20 ratio) or Ac<sub>4</sub>GlcNAc (1 mM) for 8 h, prior to fixation with 4% paraformaldehyde in PBS for 15 min at rt. Subsequent reaction with biotin-alk and incubation with streptavidin-AlexaFluor594 enabled fluorescence detection of modified glycoconjugates.
